# Supplementary material
Source: Springer Nature journal article supplement (https://www.springermedizin.de/resource/supplementary/12936_2010_1329_MOESM3_ESM.pdf/9549532)

**OLYSET**

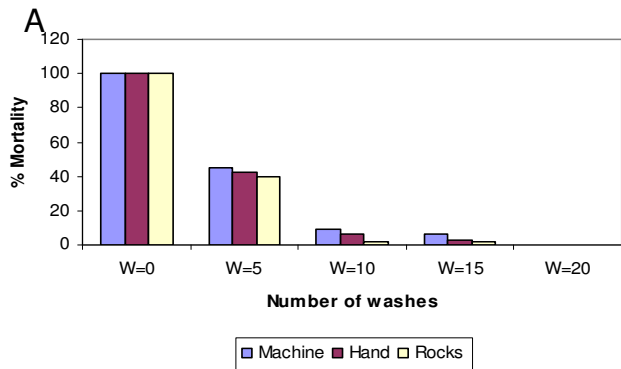

**PERMANET**

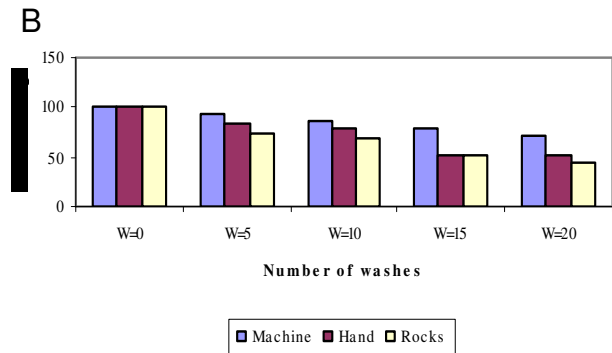

**BASF**

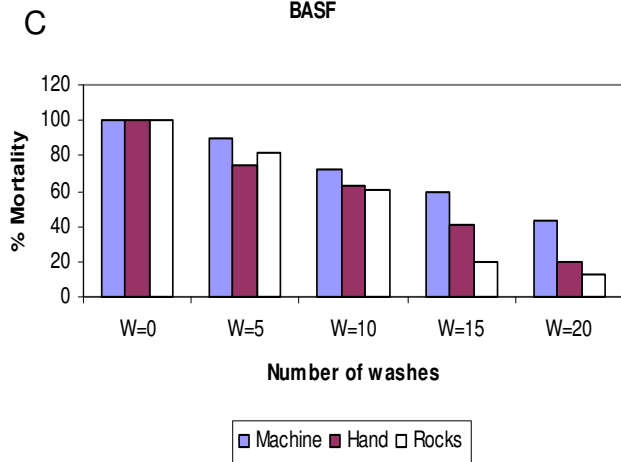

**TNT**

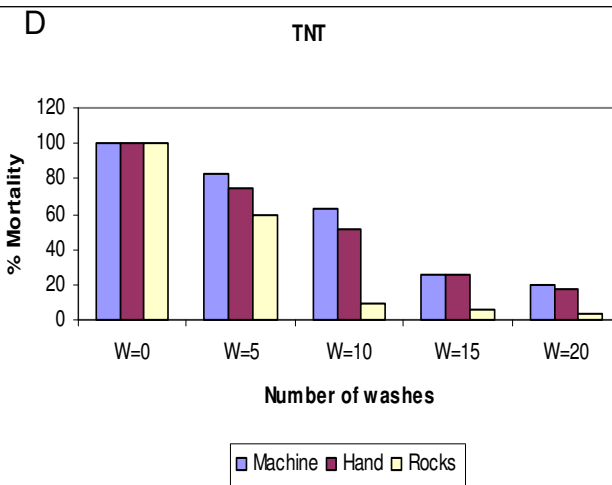

Supplement: MOESM3 [file 9549532]
